# Supplementary material for: All-stage precisional glioma targeted therapy enabled by a well-designed D-peptide
Source: PubMed Central journal article supplement (PMC7086363; doi:10.7150/thno.41382), 2020-03-04
Supplement: thnov10p4073s1.pdf [file thnov10p4073s1.pdf]

## Supporting Information

### All-stage precisional glioma targeted therapy enabled by a well-designed D-peptide

Danni Ran <sup>a†</sup>, Jianfen Zhou <sup>a†</sup>, Zhilan Chai <sup>a</sup>, Jinyang Li <sup>a</sup>, Cao Xie <sup>a</sup>, Jiani Mao <sup>a</sup>, Linwei Lu <sup>b</sup>, Yanyu Zhang <sup>a</sup>, Sunyi Wu <sup>a</sup>, Changyou Zhan <sup>a,c</sup>, Weiyue Lu <sup>a,b,d,\*</sup>

<sup>a</sup> Department of Pharmaceutics, School of Pharmacy, Fudan University, and Key Laboratory of Smart Drug Delivery (Fudan University), Ministry of Education and PLA, Shanghai 201203, & State Key Laboratory of Medical Neurobiology and MOE Frontiers Center for Brain Science, Institutes of Brain Science, Fudan University, Shanghai 200032, China.

<sup>b</sup> Department of Integrative Medicine, Huashan Hospital, and Institutes of Integrative Medicine of Fudan University, Shanghai 200041, China

<sup>c</sup> Department of Pharmacology, School of Basic Medical Sciences, Fudan University, Shanghai 200032, & State Key Laboratory of Molecular Engineering of Polymers, Fudan University, Shanghai 200433, China.

<sup>d</sup> Minhang Branch, Zhongshan Hospital and Institute of Fudan-Minghang Academic Health System, Minghang Hospital, Fudan University, Shanghai 201199, China

\* Corresponding author: Tel: +86 21 51980006, Fax: +86 215288 0090

*Email:* [wylu@shmu.edu.cn](mailto:wylu@shmu.edu.cn).

†These authors contributed equally to this work.

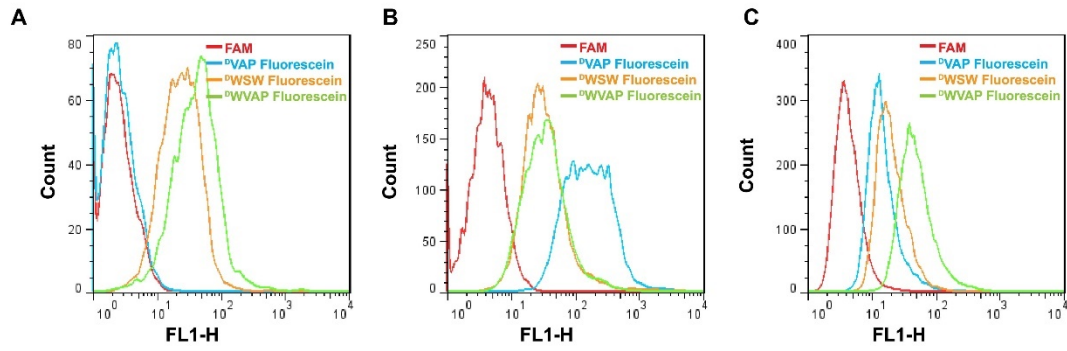

**Figure S1.** Quantitative cellular uptake was measured by flow cytometry in (A) BCEC cells, (B) U87 cells and (C) HUVEC cells.

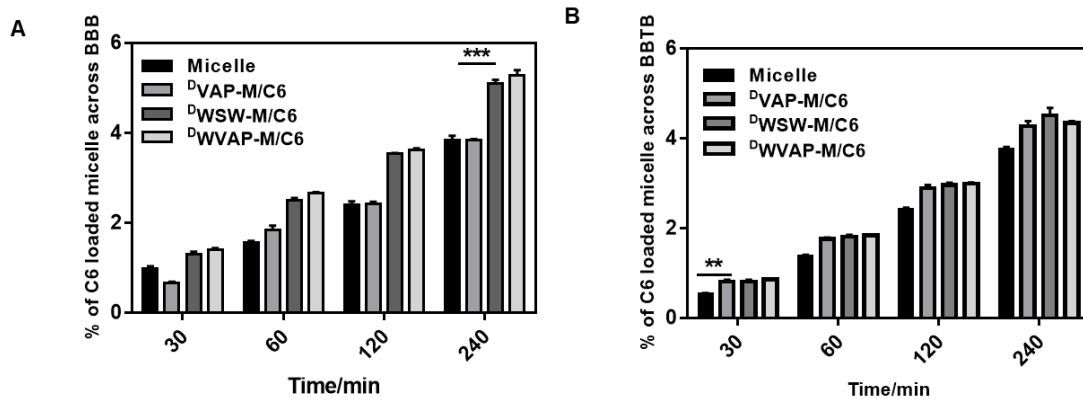

**Figure S2.** Evaluation of the BBB and BBTB penetrating capacity *in vitro* by using BCECs or HUVEC monolayers. (A) Transcytosis efficiency of Coumarin-6-loaded plain Micelles, <sup>125</sup>I-VAP Micelles, <sup>125</sup>I-WSW Micelles and <sup>125</sup>I-WVAP Micelles on *in vitro* BBB model. (B) Transcytosis efficiency of Coumarin-6-loaded plain Micelles, <sup>125</sup>I-VAP Micelles, <sup>125</sup>I-WSW Micelles and <sup>125</sup>I-WVAP Micelles on *in vitro* BBTB model. Data were presented as mean  $\pm$  SD, n = 3, \*\* p < 0.01, \*\*\* p < 0.001.

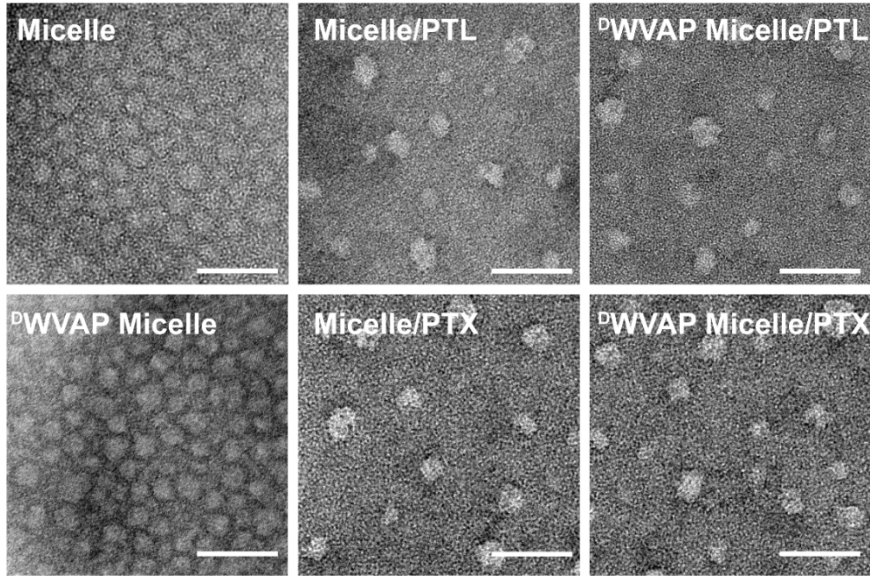

**Figure S3.** TEM images of <sup>D</sup>WVAP peptide modified micelles. (Bar = 50 nm)

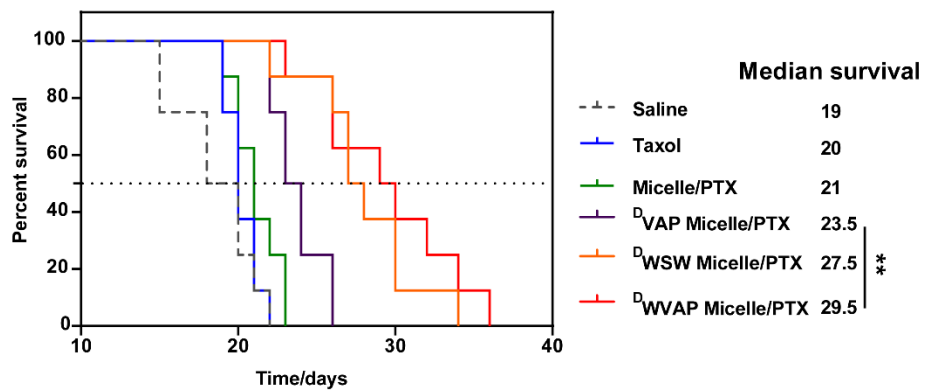

**Figure S4.** Kaplan–Meier survival curves of intracranial glioblastoma-implanted nude mice treated with different regimens. Mice (n = 8) were treated with four injections (6 mg/kg each time) of equal PTX dose (at 6, 9, 12 and 15 days after glioblastoma implantation). \*\*p < 0.01

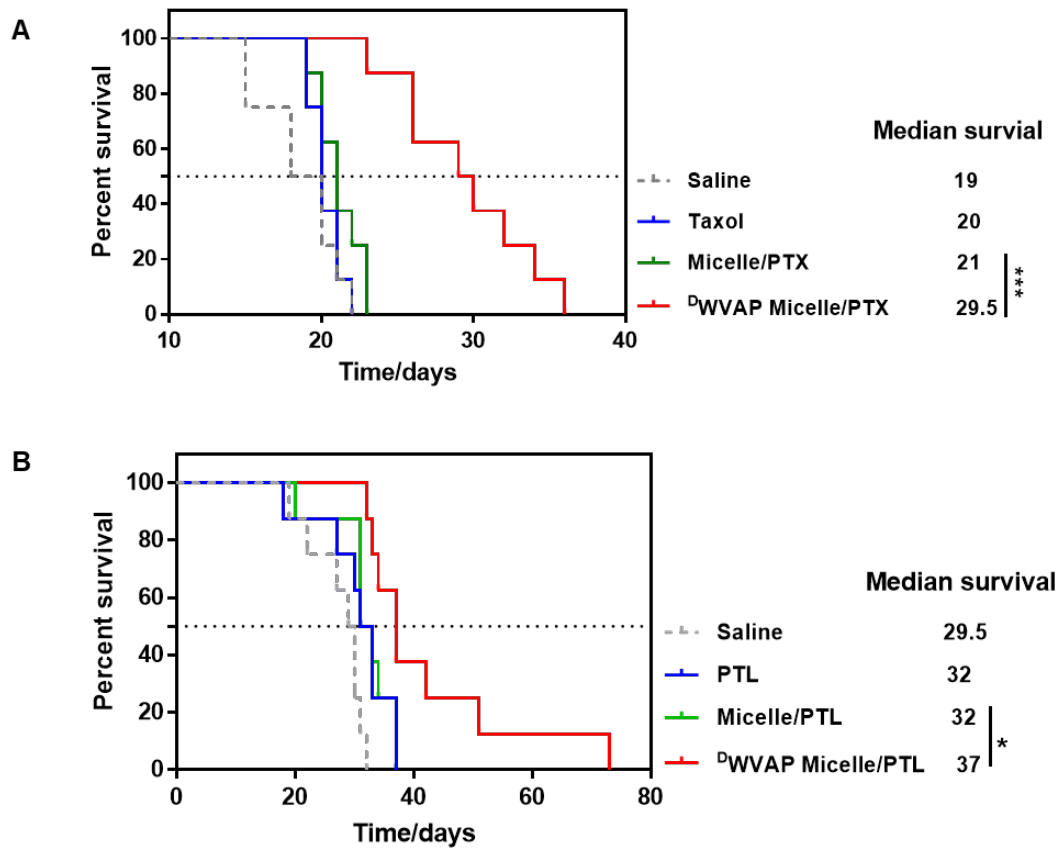

**Figure S5.** Kaplan–Meier survival curves of intracranial glioblastoma-implanted nude mice treated with different regimens. (A) Mice (n = 8) were treated with four injections (6 mg/kg each time) of equal PTX dose (at 6, 9, 12 and 15 days after glioblastoma implantation). (B) Mice (n = 8) were treated with five injections (5 mg/kg each time) of equal PTL dose (at 6, 8, 10, 12 and 14 days after glioblastoma implantation). \* $p < 0.05$ , \*\*\* $p < 0.001$

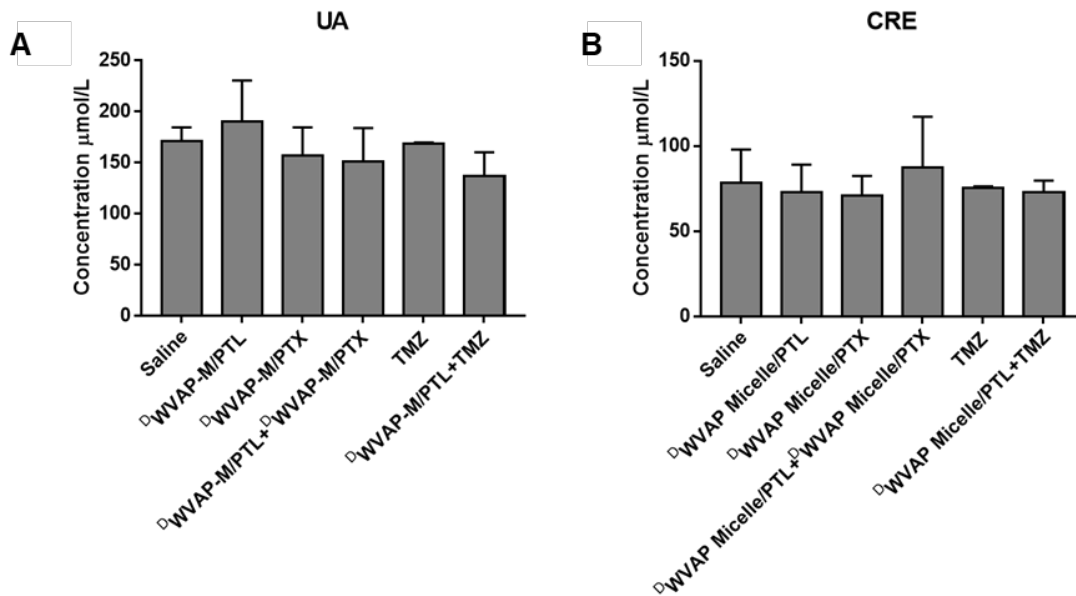

**Figure S6.** Biochemical analysis of blood samples from various formulation treated groups. UA (Uric acid) and CRE (Creatinine) were used to evaluate the kidney functions (A and B).

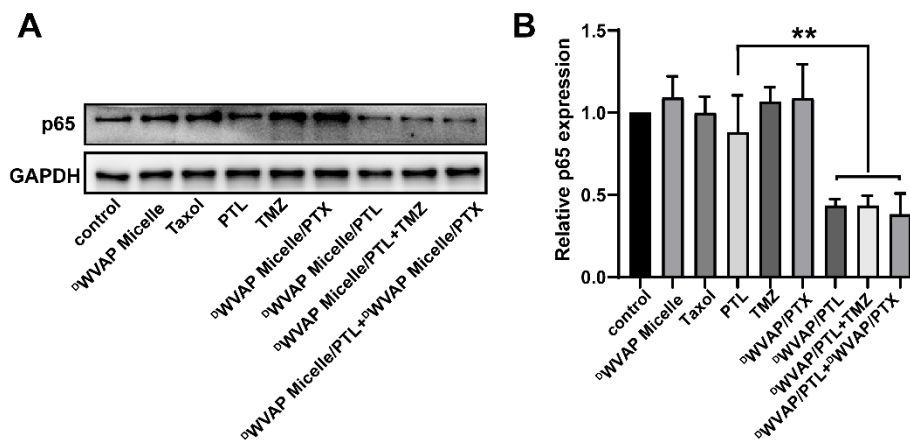

**Figure S7.** P65 protein expression in the nucleus of U87 cells analyzed by (A) Western blotting, (B) relative protein expression were quantified using ImageJ software. Results were presented as mean  $\pm$  SD, n= 3, \*\*p < 0.01.

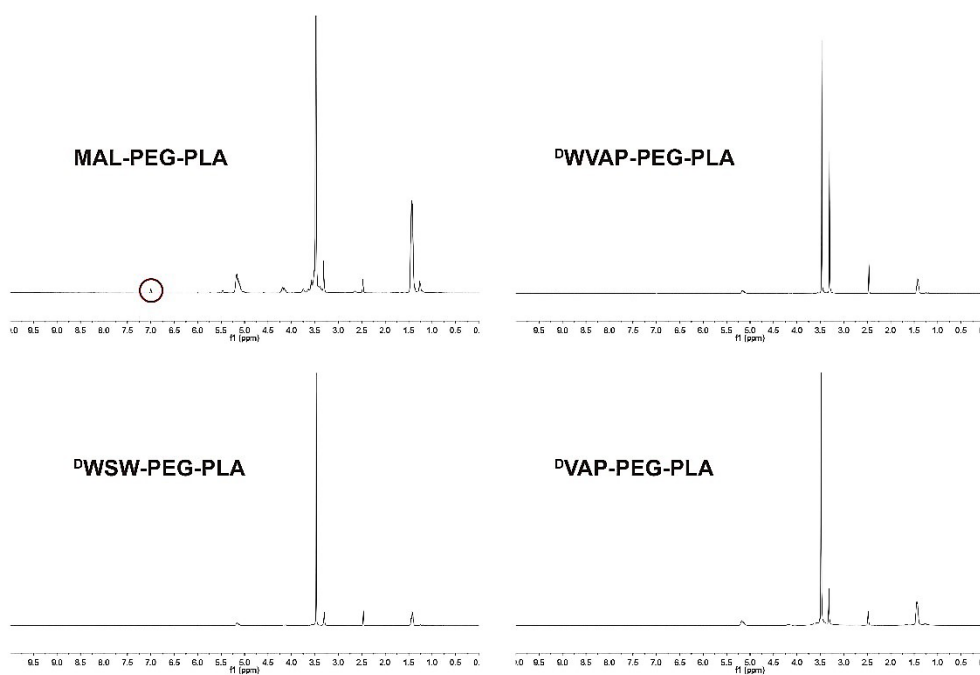

**Figure S8.** The NMR spectra of Mal-PEG<sub>3000</sub>-PLA<sub>2000</sub>, <sup>D</sup>WVAP-PEG<sub>3000</sub>-PLA<sub>2000</sub>, <sup>D</sup>VAP-PEG<sub>3000</sub>-PLA<sub>2000</sub> and <sup>D</sup>WSW-PEG<sub>3000</sub>-PLA<sub>2000</sub>. The Mal group presented a sharp peak around 7 ppm in NMR spectrum of Mal-PEG<sub>3000</sub>-PLA<sub>2000</sub>, which disappeared in that of <sup>D</sup>WVAP-PEG<sub>3000</sub>-PLA<sub>2000</sub>, <sup>D</sup>VAP-PEG<sub>3000</sub>-PLA<sub>2000</sub> and <sup>D</sup>WSW-PEG<sub>3000</sub>-PLA<sub>2000</sub>.

**Table S1.** Characterization of different micelles (n = 3).

| Formulation                   | Size (nm)    | Zeta Potential (mV) | Encapsulation efficiency (%) | Drug loading capacity (%) |
|-------------------------------|--------------|---------------------|------------------------------|---------------------------|
| Micelle/PTX                   | 29.11 ± 2.59 | -2.82 ± 1.10        | 88.36 ± 1.84                 | 20.75 ± 0.76              |
| Micelle/PTL                   | 25.69 ± 1.97 | -2.86 ± 1.21        | 87.36 ± 1.62                 | 8.84 ± 0.51               |
| <sup>D</sup> WVAP Micelle/PTX | 29.25 ± 1.87 | -0.53 ± 0.92        | 84.52 ± 1.82                 | 20.65 ± 1.29              |
| <sup>D</sup> WVAP Micelle/PTL | 27.60 ± 2.42 | -0.55 ± 0.85        | 83.09 ± 1.80                 | 8.86 ± 0.34               |
